# Supplementary material for: No evidence of a human influence on the mineralization of terrestrial dissolved organic matter (DOM) in Alpine fluvial networks
Source: Copernicus journal article supplement (doi:10.5194/bg-2021-131), 2021-06-02

# No evidence of a human influence on the mineralization of terrestrial dissolved organic matter (DOM) in Alpine fluvial networks

Thibault Lambert<sup>1,\*</sup>, Pascal Perolo<sup>1</sup>, Nicolas Escoffier<sup>1</sup>, Marie-Elodie Perga<sup>1</sup>

<sup>1</sup> Faculty of Geoscience and Environment, Institute of Earth Surface Dynamics, University of Lausanne, Lausanne, Switzerland

## Supplementary information

**Figure S1** – Spectral loadings of the PARAFAC components identified in our study sites.

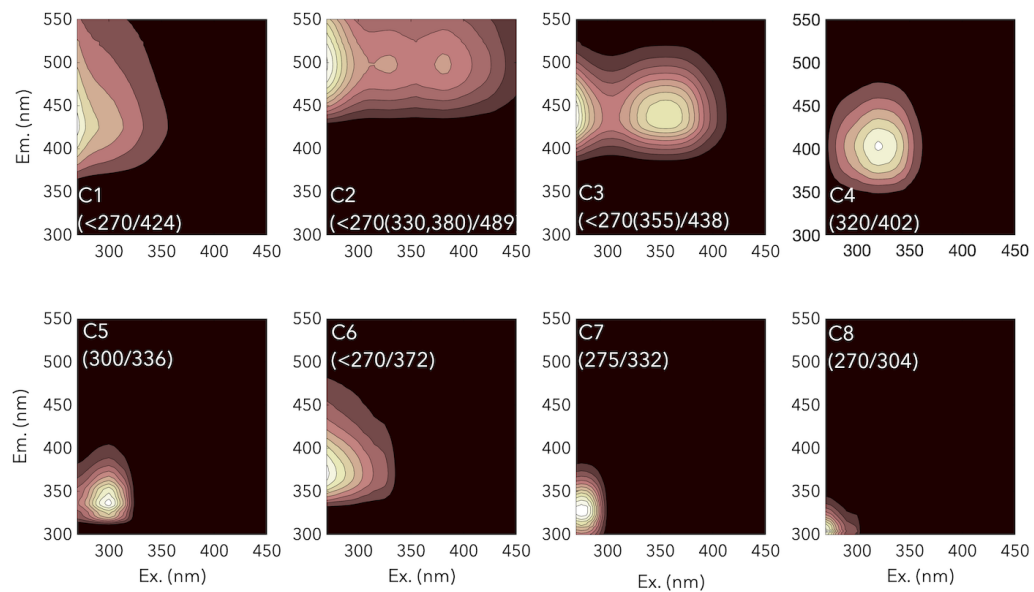

**Figure S2** – Relationships between (A) BDOC, (B) decay constants and (C) the size of the STRC pools with the sum of initial  $F_{Max}$  values of C6, C7, and C8 components.

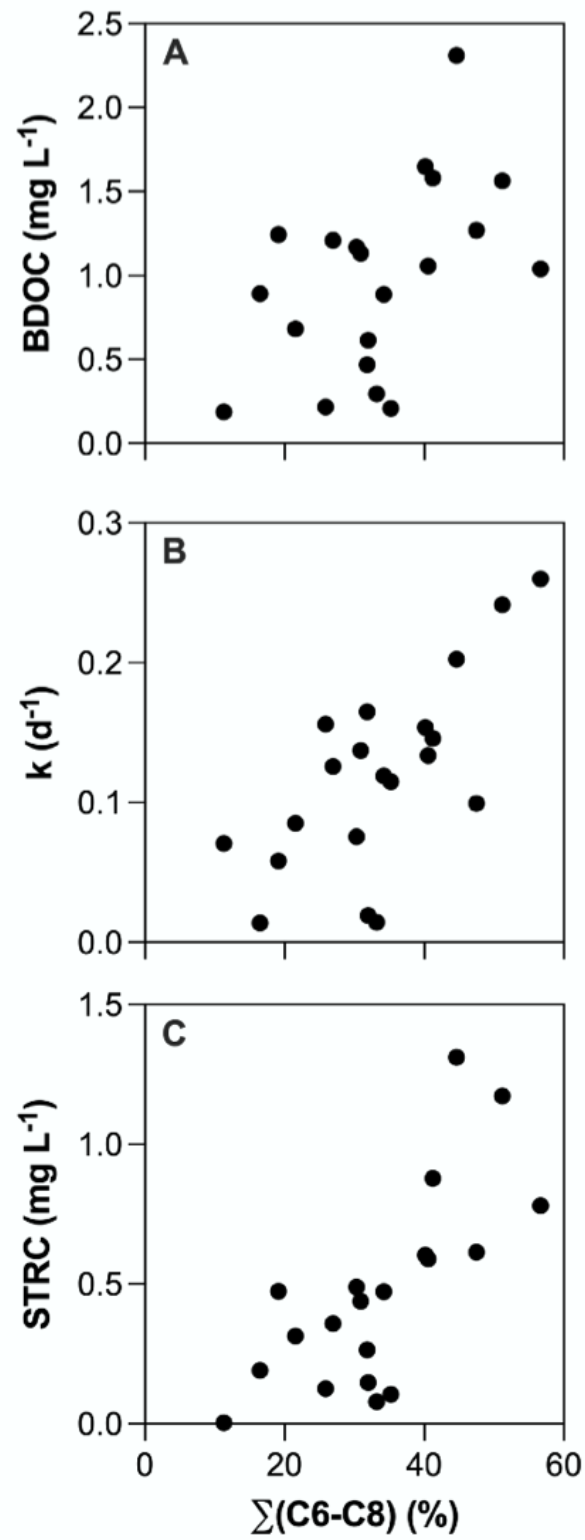

**Figure S3** – Relationships between the relative proportion of C5 component and Strahler order in the Lake Geneva Basin.

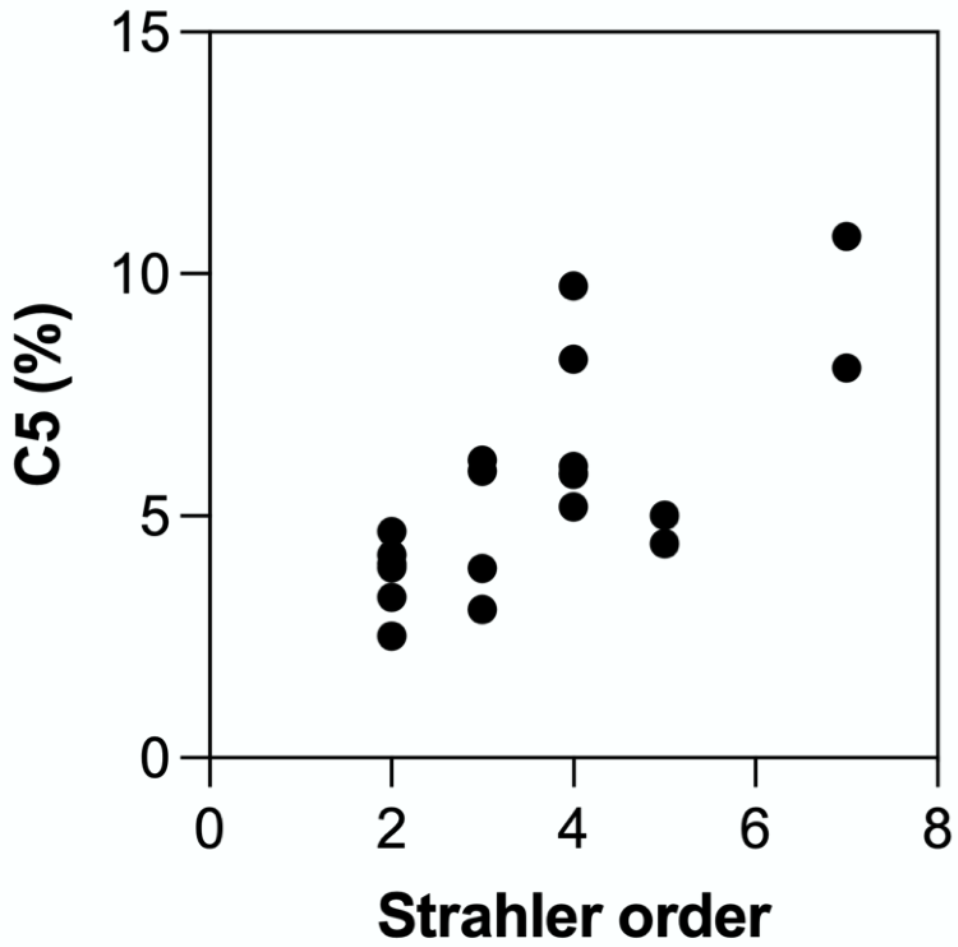

Supplement: Supplementary file 1 [file bg-2021-131-supplement.pdf]
